# Supplementary material
Source: publisher figshare collection journal article supplement (https://acs.figshare.com/ndownloader/files/9262519)
Supplement: Supplementary file 1 [file 9262519]

## Sheet: Sheet1
Supplementary Table 4 Antibacterial activity of copsin mutants against S. aureus
1) The red line indicates the time threshold when growth of S. aureus incubated with native copsin reached an OD600 of 0.1.
2) Cells marked in green indicate OD600 values of below 0.1.
Time (hh:mm)	Medium LB	S. aureus	Copsin native	Q1S	P4G	R7H	S13H	T16H	T16G	D29H	V30H	V30R	T41G	T41S	F43W	L44W	T46H	T46S	P55R
00:00:00	0.0872	0.0865	0.0864	0.0848	0.0854	0.0842	0.0852	0.0848	0.0938	0.0856	0.0878	0.0868	0.086	0.0858	0.0863	0.086	0.0861	0.0859	0.0872
00:15:00	0.087	0.0863	0.0861	0.0844	0.0854	0.0851	0.0852	0.0847	0.0934	0.0853	0.0875	0.0867	0.0857	0.0857	0.0862	0.0857	0.0858	0.084	0.0869
00:30:00	0.0871	0.0863	0.0861	0.0847	0.0852	0.0842	0.0852	0.0846	0.0934	0.0853	0.0877	0.0867	0.0857	0.0856	0.0861	0.0856	0.086	0.0841	0.0871
00:45:00	0.087	0.0866	0.086	0.0848	0.0892	0.0845	0.0854	0.0846	0.0934	0.0854	0.0877	0.087	0.0859	0.0858	0.0862	0.0859	0.086	0.0841	0.087
01:00:00	0.087	0.0869	0.0864	0.0849	0.0895	0.0847	0.0853	0.0847	0.0938	0.0856	0.0882	0.0873	0.0861	0.0862	0.0866	0.086	0.0863	0.0845	0.087
01:15:00	0.087	0.0876	0.0866	0.0853	0.0861	0.0849	0.0854	0.0849	0.0939	0.0857	0.0883	0.0877	0.0864	0.0866	0.0868	0.0863	0.0865	0.0848	0.0872
01:30:00	0.087	0.0891	0.087	0.0859	0.0869	0.0855	0.0857	0.0854	0.0945	0.0862	0.0889	0.0883	0.0869	0.0873	0.0872	0.087	0.0869	0.085	0.0876
01:45:00	0.0868	0.0917	0.0873	0.0863	0.0879	0.0861	0.0855	0.0853	0.0949	0.094	0.0893	0.0893	0.0876	0.0888	0.0878	0.0877	0.0872	0.0856	0.0878
02:00:00	0.087	0.0968	0.0883	0.0875	0.0886	0.087	0.0857	0.0858	0.0958	0.0866	0.0902	0.0912	0.0889	0.0915	0.0888	0.0886	0.0881	0.0868	0.0886
02:15:00	0.087	0.1065	0.0897	0.0891	0.0896	0.0887	0.0859	0.0864	0.0974	0.0875	0.0917	0.0941	0.0906	0.0961	0.0904	0.0903	0.0892	0.0881	0.0898
02:30:00	0.0868	0.1219	0.0914	0.0916	0.0913	0.0907	0.0862	0.0874	0.099	0.088	0.0935	0.0979	0.0927	0.1035	0.092	0.0924	0.0905	0.09	0.0911
02:45:00	0.087	0.1442	0.0936	0.0944	0.0943	0.0942	0.0862	0.0892	0.1011	0.0895	0.0965	0.1047	0.0962	0.1159	0.0961	0.0962	0.0923	0.093	0.0936
03:00:00	0.087	0.1757	0.0976	0.1	0.099	0.0991	0.0863	0.0911	0.1044	0.0909	0.1008	0.115	0.1026	0.1368	0.1014	0.1033	0.0955	0.0982	0.0977
03:15:00	0.087	0.2117	0.1018	0.1053	0.1051	0.106	0.0865	0.0934	0.1088	0.0929	0.1077	0.13	0.11	0.1672	0.1071	0.1128	0.1002	0.105	0.1042
03:30:00	0.0868	0.2523	0.1057	0.1125	0.1118	0.1141	0.0869	0.0962	0.1139	0.0966	0.1163	0.1513	0.1178	0.1868	0.1147	0.1247	0.1081	0.1158	0.114
03:45:00	0.0869	0.2951	0.1108	0.1207	0.1204	0.1219	0.0874	0.0995	0.1211	0.101	0.1261	0.1834	0.1294	0.2156	0.1253	0.1406	0.12	0.129	0.1269
04:00:00	0.0869	0.3334	0.1157	0.1329	0.1282	0.1306	0.0873	0.1028	0.1272	0.1077	0.1383	0.2149	0.1452	0.2491	0.1391	0.158	0.1339	0.1451	0.1391
04:15:00	0.087	0.3805	0.122	0.1503	0.1452	0.14	0.0878	0.1072	0.1347	0.1161	0.1521	0.25	0.1661	0.2851	0.1613	0.1924	0.1502	0.1628	0.1529
04:30:00	0.0869	0.4203	0.1275	0.1621	0.1681	0.1482	0.0881	0.1114	0.1448	0.1258	0.167	0.2833	0.1768	0.3167	0.1823	0.2077	0.1709	0.182	0.165
04:45:00	0.0868	0.4462	0.1336	0.1747	0.1814	0.1573	0.0885	0.1159	0.1617	0.1367	0.1886	0.3153	0.1929	0.3455	0.1999	0.2305	0.2029	0.2062	0.1794
05:00:00	0.0869	0.4554	0.1425	0.1974	0.1999	0.1664	0.0892	0.1211	0.1957	0.1502	0.2155	0.347	0.2172	0.3741	0.2279	0.2578	0.2257	0.2338	0.1974
05:15:00	0.0868	0.4544	0.1488	0.2248	0.233	0.1755	0.0903	0.125	0.2034	0.1639	0.2331	0.3768	0.2452	0.393	0.2615	0.2866	0.2478	0.2575	0.2137
05:30:00	0.0869	0.4479	0.1624	0.2545	0.2737	0.1854	0.0905	0.1304	0.2227	0.1818	0.255	0.4085	0.2764	0.4151	0.3019	0.3184	0.2785	0.2832	0.2327
05:45:00	0.0869	0.4394	0.1769	0.2815	0.3104	0.1952	0.0918	0.1361	0.2539	0.2056	0.2809	0.4341	0.3059	0.431	0.3417	0.3491	0.3116	0.3047	0.2526
06:00:00	0.0867	0.4328	0.2014	0.3097	0.3449	0.2075	0.0925	0.1424	0.2843	0.2205	0.305	0.4558	0.3346	0.4447	0.3806	0.3814	0.3416	0.3274	0.2713
06:15:00	0.087	0.426	0.2287	0.3328	0.3756	0.2173	0.0939	0.1475	0.3157	0.2377	0.3304	0.4724	0.3612	0.4556	0.4149	0.4153	0.3748	0.3473	0.2892
06:30:00	0.087	0.4214	0.2603	0.3564	0.4049	0.2319	0.0951	0.1552	0.3422	0.2573	0.3536	0.4848	0.3896	0.4689	0.4465	0.4496	0.406	0.3671	0.3092
06:45:00	0.0867	0.4156	0.2794	0.3756	0.4292	0.2413	0.0971	0.1596	0.3663	0.2744	0.3808	0.4961	0.4133	0.475	0.472	0.4736	0.4383	0.3877	0.3226
07:00:00	0.0869	0.4134	0.2984	0.397	0.454	0.2527	0.0986	0.1657	0.391	0.2928	0.4068	0.5039	0.4357	0.4853	0.4954	0.4986	0.4652	0.4007	0.3391
07:15:00	0.0869	0.4126	0.3198	0.4191	0.4772	0.2649	0.1009	0.1723	0.4127	0.3089	0.4322	0.5128	0.4564	0.4946	0.5148	0.5189	0.4883	0.4156	0.3559
07:30:00	0.0869	0.4109	0.3423	0.4376	0.4995	0.2767	0.103	0.1812	0.4332	0.3279	0.4551	0.5182	0.4752	0.5049	0.5319	0.5362	0.5059	0.4294	0.372
